# Supplementary material for: A dialkynoyl analogue of DOPE improves gene transfer of lower-charged, cationic lipoplexes
Source: Royal Society of Chemistry journal article supplement (doi:10.1039/b514532e), 2005-12-06
Supplement: b514532e.pdf [file b514532e.pdf]

# A Dialkynoyl-Analogue of DOPE Improves Gene Transfer of Lower-Charged Cationic Lipoplexes

Steven Fletcher,<sup>a,c</sup> Ayesha Ahmad,<sup>a</sup> Eric Perouzel,<sup>a,b</sup> Michael R. Jorgensen\*<sup>a,b</sup> and Andrew D. Miller\*<sup>a,b</sup>

## Supporting Information

### General Information

All reactions were carried out under an atmosphere of nitrogen or argon, in oven-dried glassware. Flash column chromatography was performed as described by Still<sup>165</sup> with Merck silica gel 60 (230 – 240 mesh). TLC refers to thin layer chromatography performed on pre-coated Merck silica gel 60 F<sub>254</sub> aluminium-backed plates, and visualised with a UV lamp (254 and 366 nm) and / or stained with acidic ammonium molybdate (IV), basic potassium manganate (VII; KmnO<sub>4</sub>), iodine, or ninhydrin. CH<sub>2</sub>Cl<sub>2</sub> was distilled over P<sub>2</sub>O<sub>5</sub>, and other solvents were bought and pre-dried as required. All chemicals were purchased from Sigma-Aldrich, Lancaster and Merck Biosciences. Special solvent mixtures: solvent A – CH<sub>2</sub>Cl<sub>2</sub>:MeOH:H<sub>2</sub>O, 77.54:23.23:2.23; solvent B – CH<sub>2</sub>Cl<sub>2</sub>:MeOH:H<sub>2</sub>O, 65:25:4; solvent C – CH<sub>2</sub>Cl<sub>2</sub>:MeOH:NH<sub>4</sub>OH, 25:7:1, solvent D – CH<sub>2</sub>Cl<sub>2</sub>:MeOH:AcOH, 92:7:1, solvent E – CH<sub>2</sub>Cl<sub>2</sub>:MeOH:NH<sub>4</sub>OH, 65:25:4. <sup>1</sup>H and <sup>13</sup>C NMR spectra were recorded on either Bruker DRX300, Joel GX-270Q or Bruker Avance 400, using residual isotopic solvent (CDCl<sub>3</sub>, δ<sub>H</sub> = 7.27 ppm, δ<sub>C</sub> = 77.00 ppm; CD<sub>3</sub>OD, δ<sub>H</sub> = 3.84 ppm, δ<sub>C</sub> = 49.05 ppm; (CD<sub>3</sub>)<sub>2</sub>SO, δ<sub>H</sub> = 2.50 ppm, δ<sub>C</sub> = 39.43 ppm; D<sub>2</sub>O, δ<sub>H</sub> = 4.82 ppm) as an internal reference. Data are reported as follows: (integration; br = broad; s = singlet, d = doublet, t = triplet, q = quartet, quin = quintet, sex = sextet, m = multiplet; coupling constant(s) in Hz; assignment). Mass spectra were recorded using VG-070B, Joel SX-102 or Bruker Esquire 3000 ESI instruments. IRs were obtained on a JASCO FT/IR-620 infra-red spectrometer. Analytical HPLC (Hitachi-LaChrom L-7150 pump system equipped with a Polymer Laboratories PL-ELS 1000 evaporative light scattering detector) was conducted on a HICHROM KR60-5-2493 silica column, with mobile

phase A (CHCl<sub>3</sub>:MeOH:NH<sub>4</sub>OH, 80:19.5:0.5) and mobile phase B (CHCl<sub>3</sub>:MeOH:H<sub>2</sub>O:NH<sub>4</sub>OH, 60:34:5.5:0.5), A/B, 0 – 6 min [100/0], gradient 6 – 28 min [0/100], 28 – 38 [0/100], gradient 38 – 40 min [100/0], 40 – 60 min [100/0].

## Synthesis of Lipids

2-(8-Iodooctyl-1-oxy)tetrahydropyran (**6**).

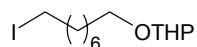

To a stirred solution of 8-bromooctan-1-ol (10.0 g, 47.8 mmol) in anhydrous CH<sub>2</sub>Cl<sub>2</sub> (230 cm<sup>3</sup>) at 0°C, under N<sub>2</sub> was added DHP (5.45 cm<sup>3</sup>, 59.8 mmol, 1.25) and PPTS (1.80 g, 15 mol%). The reaction mixture was allowed to stir for 16 h in the water bath, under a N<sub>2</sub> atmosphere, by which time the solution had turned slightly brown in colour. The reaction mixture was neutralised with aqueous NaHCO<sub>3</sub> (150 cm<sup>3</sup>), the organic phase was collected, and the aqueous phase was re-extracted with CH<sub>2</sub>Cl<sub>2</sub> (2 x 100 cm<sup>3</sup>). The organic fractions were combined, washed with water (130 cm<sup>3</sup>), brine (130 cm<sup>3</sup>), dried (Na<sub>2</sub>SO<sub>4</sub>), filtered, and concentrated. The crude residue was purified by SiO<sub>2</sub> flash chromatography (hexane:EtOAc, 9:1), to furnish the bromo THP ether as a bright yellow oil (13.0 g, 93%): R<sub>f</sub> 0.60 [hexane:EtOAc, 1:1]; δ<sub>H</sub> (300 MHz; CDCl<sub>3</sub>) 1.28 – 1.49 (8 H, m, 4 x CH<sub>2</sub>), 1.50 – 1.67 (6 H, m, 3 x CH<sub>2</sub>), 1.68 – 1.92 (4 H, 2 m, 2 x CH<sub>2</sub>), 3.36 – 3.43 (1 H, m, CHO), 3.42 (2 H, t, *J* 6.8, CH<sub>2</sub>Br), 3.48 – 3.55 (1 H, m, CHO), 3.71 – 3.79 (1 H, m, CHO), 3.85 – 3.92 (1 H, m, CHO), 4.59 (1 H, t, *J* 3.6, OCHO); δ<sub>C</sub> (100 MHz; CDCl<sub>3</sub>) 20.06, 25.88, 26.50, 28.47, 29.06, 29.80, 30.05 (7 x CH<sub>2</sub>), 31.14 (CH<sub>2</sub>CHO), 33.16 (CH<sub>2</sub>CH<sub>2</sub>Br), 34.29 (CH<sub>2</sub>Br), 62.67, 67.92 (2 x CH<sub>2</sub>O) 99.18 (OCHO); *m/z* (EI) 293 ([M – H]<sup>+</sup>, 15), 291 ([M – H]<sup>+</sup>, 15), 221 (6), 219 (6), 193 (5), 191 (6), 164 (5), 162 (5), 101 (55), 85 (100), 69 (100), 58 (80), 57 (100), 55 (100), 49 (58), 44 (87), 41 (100); found [M – H]<sup>+</sup>, 293.094513, C<sub>13</sub>H<sub>24</sub>O<sub>2</sub><sup>81</sup>Br requires [M – H]<sup>+</sup>, 293.093920, found [M – H]<sup>+</sup>, 291.096336, C<sub>13</sub>H<sub>24</sub>O<sub>2</sub><sup>79</sup>Br requires [M – H]<sup>+</sup>, 291.095966. NaI (8.59 g, 57.3 mmol) was

dissolved in a solution of the bromo THP ether (8.40 g, 28.6 mmol) in acetone (160 cm<sup>3</sup>). The stirred, slightly cloudy solution was then placed under reflux, under N<sub>2</sub> for 15 min, during which period a solid precipitated out of solution. The reaction mixture was filtered, and concentrated. The residue was dissolved in water (150 cm<sup>3</sup>) and CH<sub>2</sub>Cl<sub>2</sub> (200 cm<sup>3</sup>). Then, the organic layer was separated, and the aqueous layer was extracted with CH<sub>2</sub>Cl<sub>2</sub> (2 x 200 cm<sup>3</sup>). The organic layers were combined, washed with water (100 cm<sup>3</sup>), brine (100 cm<sup>3</sup>), dried (Na<sub>2</sub>SO<sub>4</sub>), filtered, and concentrated to afford crude **6** as a bright yellow, non-viscous oil. This residue was purified by silica gel column chromatography (hexane:EtOAc, 13:1), giving **6** as a pale yellow, non-viscous oil (8.66 g, 89%): R<sub>f</sub> 0.62 [hexane:EtOAc, 1:1]; δ<sub>H</sub> (270 MHz; CDCl<sub>3</sub>) 1.25 – 1.44 (8 H, m, 4 x CH<sub>2</sub>), 1.45 – 1.73 (6 H, m, 3 x CH<sub>2</sub>), 1.74 – 1.90 (4 H, 2 m, 2 x CH<sub>2</sub>), 3.17 (2 H, t, *J* 7.0, CH<sub>2</sub>), 3.32 – 3.41 (1 H, m, CHO), 3.34 – 3.43 (1 H, m, CHO), 3.67 – 3.76 (1 H, m, CHO), 3.81 – 3.90 (1 H, m, CHO), 4.56 (1 H, t, *J* 3.6, OCHO); δ<sub>C</sub> (100 MHz; CDCl<sub>3</sub>), 7.62 (CH<sub>2</sub>), 20.09, 25.89, 26.53, 28.85, 29.62, 30.07 (6 x CH<sub>2</sub>), 30.82 (CH<sub>2</sub>CH<sub>2</sub>CH<sub>2</sub>), 62.72, 67.96 (2 x CH<sub>2</sub>O), 99.22 (OCHO); *m/z* (EI) 339 ([M – H]<sup>+</sup>, 10), 101 (46), 86 (79), 85 (100), 69 (96), 67 (44), 58 (53), 57 (89), 55 (100), 49 (100), 47 (53), 44 (73); found [M – H]<sup>+</sup>, 339.082839, C<sub>13</sub>H<sub>24</sub>O<sub>2</sub> requires [M – H]<sup>+</sup>, 339.082107.

*2-(Octadec-9-ynyl-1-oxy)tetrahydropyran (7)*.

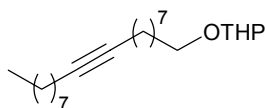

To a stirred solution of 1-decyne (2.40 cm<sup>3</sup>, 13.5 mmol) in anhydrous THF (23 cm<sup>3</sup>) at 0°C, under a N<sub>2</sub> atmosphere, was added *n*-BuLi (2.17 M in hexanes; 8.71 cm<sup>3</sup>, 18.9 mmol) dropwise. After 15 min, the solution had become orange-red in colour. HMPA (23 cm<sup>3</sup>) was added to the solution, turning the reaction mixture blood red in colour. After a further 15 min, **6** (5.50 g, 16.2 mmol) was added with anhydrous THF (11 cm<sup>3</sup>), turning the solution yellow-orange. Within 1.5 h, the

solution had turned darker in colour. The reaction mixture was allowed to stir at RT for a further 48 h, then poured onto an ice / water mixture (150 cm<sup>3</sup>). Crude **7** was extracted with diethyl ether (3 x 150 cm<sup>3</sup>), and the combined organic layers were combined, washed with water (75 cm<sup>3</sup>), brine (75 cm<sup>3</sup>), dried (Na<sub>2</sub>SO<sub>4</sub>), and concentrated. The crude residue was purified by flash chromatography residue (hexane:EtOAc, 30:1) to yield **7** as a pale-yellow oil (3.42 g, 72%): R<sub>f</sub> 0.58 [hexane:EtOAc, 2:1]; δ<sub>H</sub> (400 MHz; CDCl<sub>3</sub>) 0.99 (3 H, t, *J* 6.8, CH<sub>3</sub>), 1.33 – 1.98 (30 H, 4 m, 15 x CH<sub>2</sub>), 2.24 (4 H, 2 t, *J* 7.2, CH<sub>2</sub>C≡CCH<sub>2</sub>), 3.49 (1 H, m, CHO), 3.44 – 3.61 (1 H, m, CHO), 3.84 (1 H, m, CHO), 3.98 (1 H, m, CHO), 4.68 (1 H, t, *J* 3.2, OCHO); δ<sub>C</sub> (100 MHz; CDCl<sub>3</sub>) 13.86 (CH<sub>3</sub>), 18.11, 19.01, 21.32, 22.48, 25.78, 26.35, 29.69, 29.92, 29.95, 29.97, 29.99, 30.09 (15 CH<sub>2</sub>), 31.39 (CH<sub>2</sub>CHO), 62.49, 67.89 (2 x CH<sub>2</sub>O), 80.21, 80.30 (C≡C), 99.57 (OCHO); *m/z* (FAB<sup>+</sup>) 351 ([M + H]<sup>+</sup>, 4), 349 ([M – H]<sup>+</sup>, 5), 85 (100); found [M – H]<sup>+</sup>, 349.310951, C<sub>23</sub>H<sub>41</sub>O<sub>2</sub> requires [M – H]<sup>+</sup>, 349.310656.

*Octadec-9-yn-1-ol* (**8**).

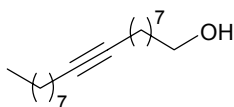

Compound **7** (3.31 g, 9.44 mmol) was dissolved in methanol (150 cm<sup>3</sup>), and *p*-TsOH.H<sub>2</sub>O (180 mg, 10 mol%) was added. The reaction mixture was allowed to stir at RT for 20 h, after which the mixture was diluted with diethyl ether (300 cm<sup>3</sup>), then quenched with aqueous NaHCO<sub>3</sub> (150 cm<sup>3</sup>). The organic ether layer was separated, and the aqueous/methanol layer was re-extracted with further diethyl ether (2 x 200 cm<sup>3</sup>). The combined organic layers were washed with water (100 cm<sup>3</sup>), brine (100 cm<sup>3</sup>), dried (MgSO<sub>4</sub>), filtered, and concentrated *in vacuo* to give a yellow oil. The crude material was dry-loaded onto silica gel and purified by flash column chromatography (hexane:EtOAc, 4:1), yielding the title compound as a white powder (2.32 g, 92%): R<sub>f</sub> 0.37 [hexane:EtOAc, 2:1]; ν<sub>max</sub> (nujol mull)/cm<sup>-1</sup> 3399 (br), 2243; δ<sub>H</sub> (400 MHz; CDCl<sub>3</sub>) 0.65 (3 H, t, *J* 6.8, CH<sub>3</sub>),

1.00 – 1.42 (24 H, 3 m, 12 x CH<sub>2</sub>), 1.91 (4 H, 2 t, *J* 6.8, CH<sub>2</sub>C≡CCH<sub>2</sub>), 3.41 (2 H, t, *J* 6.6, CH<sub>2</sub>OH); δ<sub>C</sub> (100 MHz; CDCl<sub>3</sub>) 14.51 (CH<sub>3</sub>), 19.14, 19.17, 23.08, 25.04, 29.02, 29.18, 29.23, 29.37, 29.47, 29.54, 29.58, 29.64, 32.26, 32.74 (14 x CH<sub>2</sub>), 63.82 (CH<sub>2</sub>OH), 80.48, 80.78 (C≡C); *m/z* (Cl<sup>+</sup>) 284 ([M + NH<sub>4</sub>]<sup>+</sup>, 100); found [M + NH<sub>4</sub>]<sup>+</sup>, 284.294269, C<sub>18</sub>H<sub>38</sub>NO requires [M + NH<sub>4</sub>]<sup>+</sup>, 284.295340.

*Octadec-9-ynoic acid (9)*.

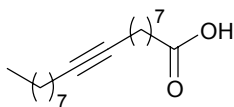

To a stirred solution of **8** (2.21 g, 8.29 mmol) in acetone (56 cm<sup>3</sup>) at 0°C was added Jones's reagent (4.48 cm<sup>3</sup>), prepared from CrO<sub>3</sub> (1.21 g, 12.1 mmol), concentrated H<sub>2</sub>SO<sub>4</sub> (1.03 cm<sup>3</sup>) and water (3.45 cm<sup>3</sup>). After 2 h oxidation, excess reagent was destroyed with propan-2-ol. The solution was neutralised with aqueous NaHCO<sub>3</sub>, and the solvent was removed *in vacuo*. The residue was dissolved in diethyl ether (250 cm<sup>3</sup>), and washed with a 2 M solution of HCl. The organic layer was collected, and the aqueous phase was extracted further with diethyl ether (3 x 150 cm<sup>3</sup>). The combined organic layers were washed with water (150 cm<sup>3</sup>), brine (150 cm<sup>3</sup>), dried (MgSO<sub>4</sub>), and concentrated. The residue was crystallised from hexane, to give **9** as a white powder (1.59 g, 69%): R<sub>f</sub> 0.21 [hexane:EtOAc, 2:1]; ν<sub>max</sub> (nujol mull)/cm<sup>-1</sup> 2263, 1724; δ<sub>H</sub> (400 MHz, CDCl<sub>3</sub>) 0.74 (3 H, t, *J* 6.8, CH<sub>3</sub>), 1.10 – 1.57 (22 H, 2 m, 11 x CH<sub>2</sub>), 1.61 (2 H, quin *J* 7.2, CH<sub>2</sub>CH<sub>2</sub>CO<sub>2</sub>H), 2.02 (4 H, t, *J* 6.7, CH<sub>2</sub>C≡CCH<sub>2</sub>), 2.21 (2 H, t, *J* 7.4, CH<sub>2</sub>CO<sub>2</sub>H); δ<sub>C</sub> (100 MHz; CDCl<sub>3</sub>) 14.51 (CH<sub>3</sub>), 19.14, 19.17, 23.08, 25.04, 29.02, 29.18, 29.23, 29.37, 29.47, 29.54, 29.58, 29.64, 32.26 (13 x CH<sub>2</sub>), 34.40 (CH<sub>2</sub>CO<sub>2</sub>H), 80.48, 80.78 (C≡C), 180.33 (CO<sub>2</sub>H); *m/z* 298 ([M + NH<sub>4</sub>]<sup>+</sup>, 100); found [M + NH<sub>4</sub>]<sup>+</sup>, 298.273873, C<sub>18</sub>H<sub>36</sub>NO<sub>2</sub> requires [M + NH<sub>4</sub>]<sup>+</sup>, 298.274605.

2-(Pent-4-ynyl-1-oxy)tetrahydropyran (**13**).

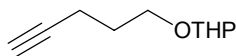

To a stirred solution of 4-pentyn-1-ol (6 cm<sup>3</sup>, 64.5 mmol), in CH<sub>2</sub>Cl<sub>2</sub> (150 cm<sup>3</sup>) at 0°C, under Ar, was added DHP (7.35 cm<sup>3</sup>, 80.6 mmol) and PPTS (2.43 g, 15 mol%). The reaction mixture was stirred for 30 min at 0°C, then allowed to warm to room temperature, and left to stir for 15 h, after which time the reaction mixture was quenched with NaHCO<sub>3</sub> (150 cm<sup>3</sup>). The aqueous phase was extracted with CH<sub>2</sub>Cl<sub>2</sub> (3 x 50 cm<sup>3</sup>), and the combined organic layers were washed with water (80 cm<sup>3</sup>), brine (80 cm<sup>3</sup>), dried (Na<sub>2</sub>SO<sub>4</sub>), and concentrated. The residue was purified by silica gel column chromatography (hexane:EtOAc, 9:1) to afford **13** as a colourless oil (6.02 g, 95%): R<sub>f</sub> 0.26 [hexane:EtOAc, 9:1]; ν<sub>max</sub> (nujol mull)/cm<sup>-1</sup> 3304, 2118; δ<sub>H</sub> (300 MHz; CDCl<sub>3</sub>) 1.51 - 1.65 (4 H, m, 2 x CH<sub>2</sub>), 1.66 - 1.78 (2 H, m, CH<sub>2</sub>), 1.83 (2 H, quin, *J* 6.6, HC≡CCH<sub>2</sub>CH<sub>2</sub>CH<sub>2</sub>O), 1.96 (1 H, t, *J* 2.8, C≡CH), 2.33 (2 H, dt, *J* 7.0, <sup>4</sup>*J* 2.6, CH<sub>2</sub>C≡CH), 3.46 - 3.56 (2 H, 2 m, 2 x CHO), 3.81 - 3.92 (2 H, 2 m, 2 x CHO), 4.62 (1 H, t, *J* 3.4, OCHO); δ<sub>C</sub> (100 MHz; CDCl<sub>3</sub>) 15.51, 19.77, 25.91, 29.04, 31.03 (5 x CH<sub>2</sub>), 62.52, 66.11 (2 x CH<sub>2</sub>O), 68.81 (CH<sub>2</sub>C≡CH), 84.75 (CH<sub>2</sub>C≡CH), 99.13 (OCHO); *m/z* (CI) 186 ([M + NH<sub>4</sub>]<sup>+</sup>, 100), 168 (27); found [M + NH<sub>4</sub>]<sup>+</sup>, 186.149475, C<sub>10</sub>H<sub>20</sub>NO<sub>2</sub> requires [M + NH<sub>4</sub>]<sup>+</sup>, 186.149404.

1-Iodotridecane (**14**).

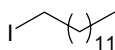

NaI (13.7 g, 91.2 mmol) was added to a stirred solution of 1-bromotridecane (12.0 g, 45.6 mmol) in acetone (250 cm<sup>3</sup>) at RT. The reaction system was flushed with N<sub>2</sub>, and placed under reflux. After 16 h, the white precipitate was filtered off, and the filtrate was concentrated *in vacuo*. The residue was

dissolved in CH<sub>2</sub>Cl<sub>2</sub> (150 cm<sup>3</sup>), and washed with water (100 cm<sup>3</sup>), and the organic layer was separated. The aqueous layer was extracted further with CH<sub>2</sub>Cl<sub>2</sub> (2 x 150 cm<sup>3</sup>). All organic layers were combined, washed with water (100 cm<sup>3</sup>), brine (100 cm<sup>3</sup>), dried (MgSO<sub>4</sub>), and concentrated *in vacuo* to give crude **14** as a pale-yellow oil in >95% purity (11.9 g, 84%): R<sub>f</sub> 0.74 [EtOAc]; δ<sub>H</sub> (270 MHz; CDCl<sub>3</sub>) 0.87 (3 H, t, *J* 6.6, CH<sub>3</sub>), 1.13 - 1.44 (20 H, m, 10 x CH<sub>2</sub>), 1.81 (2 H, quin, *J* 7.1, CH<sub>2</sub>CH<sub>2</sub>l), 3.17 (2H, t, *J* 7.0, CH<sub>2</sub>l); δ<sub>C</sub> (100 MHz; CDCl<sub>3</sub>) 7.32 (CH<sub>2</sub>l), 14.57 (CH<sub>3</sub>), 23.14, 29.03, 29.83, 29.91, 30.03, 30.10, 30.11, 30.14, 30.99 (9 x CH<sub>2</sub>), 32.38 (CH<sub>2</sub>CH<sub>2</sub>CH<sub>2</sub>l), 34.05 (CH<sub>2</sub>CH<sub>2</sub>l); *m/z* (EI) 310 (M<sup>+</sup>, 21), 183 (14), 99 (14), 85 (47), 71 (71), 57 (100), 55 (28), 43 (78), 41 (38); found [M]<sup>+</sup>, 310.115178, C<sub>13</sub>H<sub>27</sub>I requires [M]<sup>+</sup>, 310.115753.

2-(Octadec-4-ynyl-1-oxy)tetrahydropyran (**15**).

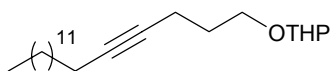

To a stirred solution of **13** (5 g, 29.7 mmol) in anhydrous THF (60 cm<sup>3</sup>) at 0°C, under a flow of N<sub>2</sub>, was added n-BuLi (2.27 M in hexanes; 17.7 cm<sup>3</sup>, 40.2 mmol) dropwise. After 15 min, HMPA (60 cm<sup>3</sup>) was added to the red solution, turning the reaction mixture a darker red in colour. After a further 15 min, **14** (11.1 g, 35.7 mmol) was added with anhydrous THF (30 cm<sup>3</sup>), turning the solution a caramel colour. The reaction mixture was allowed to stir in the water bath for 20 h, under a N<sub>2</sub> atmosphere, then poured onto an ice / water mixture (200 cm<sup>3</sup>). Crude **15** was extracted with diethyl ether (3 x 200 cm<sup>3</sup>), and the combined organic layers were combined, washed with water (100 cm<sup>3</sup>), brine (100 cm<sup>3</sup>), dried (Na<sub>2</sub>SO<sub>4</sub>), and concentrated. The residue was subjected to flash column chromatography (petroleum ether:ether, 15:1) to afford the title compound as a pale-yellow oil (5.11 g, 49%): R<sub>f</sub> 0.48 [hexane:EtOAc, 9:2]; ν<sub>max</sub> (nujol mull)/cm<sup>-1</sup> 2273; δ<sub>H</sub> (270 MHz; CDCl<sub>3</sub>) 0.86 (3 H, t, *J* 6.4, CH<sub>3</sub>), 1.13 - 1.37 (20 H, m, 10 x CH<sub>2</sub>), 1.38 - 1.60 (6 H, m, 3 x CH<sub>2</sub>), 1.61 - 1.89 (2 H, m, C≡C(CH<sub>2</sub>)<sub>2</sub>CH<sub>2</sub>O), 1.75

(2 H, quin,  $J$  6.7,  $\text{CH}_2(\text{CH}_2)_{10}\text{CH}_3$ ), 2.06 – 2.16 (2 H, m,  $\text{C}\equiv\text{CCH}_2(\text{CH}_2)_{11}\text{CH}_3$ ), 2.19 – 2.31 (2 H, m,  $\text{C}\equiv\text{CCH}_2(\text{CH}_2)_2\text{O}$ ), 3.41 - 3.52 (2 H, 2 m, 2 x CHO), 3.75 - 3.89 (2 H, 2 m, 2 x CHO), 4.58 (1 H, t,  $J$  3.3, OCHO);  $\delta_{\text{C}}$  (100 MHz;  $\text{CDCl}_3$ ) 14.48 ( $\text{CH}_3$ ), 16.01, 19.11, 19.83, 23.06, 26.87, 29.26, 29.51, 29.56, 29.66, 29.74, 29.94, 30.03, 30.05, 30.07, 31.03, 32.30 (17 x  $\text{CH}_2$ ), 62.42, 66.42 (2 x  $\text{CH}_2\text{O}$ ), 79.70, 80.95 ( $\text{C}\equiv\text{C}$ ), 99.07 (OCHO);  $m/z$  (FAB<sup>+</sup>) 351 ( $[\text{M} + \text{H}]^+$ , 9), 349 (9), 279 (1), 238 (1), 167 (3), 85 (100), 67 (10), 57 (9), 55 (12), 43 (9), 41 (11); found  $[\text{M} + \text{H}]^+$ , 349.312202,  $\text{C}_{23}\text{H}_{41}\text{O}_2$  requires  $[\text{M} + \text{H}]^+$ , 349.310656.

*Octadec-4-yn-1-ol* (**16**).

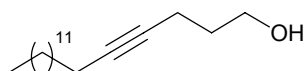

Compound **15** (4.93 g, 14.1 mmol) was dissolved in methanol (230  $\text{cm}^3$ ), and *p*-TsOH.H<sub>2</sub>O (270 mg, 10 mol%) was added. The reaction mixture was allowed to stir at RT for 16 h, after which the mixture was diluted with diethyl ether (300  $\text{cm}^3$ ), then quenched with aqueous NaHCO<sub>3</sub> (150  $\text{cm}^3$ ). The organic ether layer was separated, and the aqueous/methanol layer was re-extracted with further diethyl ether (2 x 200  $\text{cm}^3$ ). The combined organic layers were washed with water (100  $\text{cm}^3$ ), brine (100  $\text{cm}^3$ ), dried (MgSO<sub>4</sub>), filtered, and concentrated *in vacuo* to yield **16** (>95% purity) as an off-white powder (3.27 g, 87%):  $R_f$  0.39 [hexane:EtOAc, 2:1];  $\nu_{\text{max}}$  (nujol mull)/ $\text{cm}^{-1}$  3434 (br), 2259;  $\delta_{\text{H}}$  (270 MHz;  $\text{CDCl}_3$ ) 0.86 (3 H, t,  $J$  6.7,  $\text{CH}_3$ ), 1.17 - 1.39 (20 H, m, 10 x  $\text{CH}_2$ ), 1.46 (2 H, quin,  $J$  6.9,  $\text{CH}_2(\text{CH}_2)_{10}\text{CH}_3$ ), 1.55 (s, OH), 1.72 (2 H, quin,  $J$  6.4,  $\text{CH}_2\text{CH}_2\text{OH}$ ), 2.12 (2 H, tt,  $J$  6.9,  $^5J$  2.3,  $\text{CH}_2\text{C}\equiv\text{CCH}_2(\text{CH}_2)_2\text{OH}$ ), 2.27 (2 H, tt,  $J$  6.8,  $^5J$  2.3,  $\text{CH}_2\text{C}\equiv\text{CCH}_2(\text{CH}_2)_2\text{OH}$ ), 3.75 (2 H, t,  $J$  6.1,  $\text{CH}_2\text{OH}$ );  $\delta_{\text{C}}$  (100 MHz;  $\text{CDCl}_3$ ) 14.49 ( $\text{CH}_3$ ), 15.80, 19.10, 23.07, 29.29, 29.47, 29.55, 29.75, 29.94, 30.04, 30.05, 30.08, 32.00, 32.31 (14 x  $\text{CH}_2$ ), 62.34 ( $\text{CH}_2\text{OH}$ ), 79.62, 81.48 ( $\text{C}\equiv\text{C}$ );  $m/z$  (FAB<sup>+</sup>) 267 ( $[\text{M} + \text{H}]^+$ , 100), 265 (20), 239 (20), 120 (28), 95 (43), 91 (45), 81 (53), 77



(55), 69 (52), 67 (48), 57 (50), 55 (78), 43 (76), 41 (79); found  $[M + H]^+$ , 267.268707,  $C_{18}H_{35}O$  requires  $[M + H]^+$ , 267.268791.

*Octadec-4-ynoic acid (17).*

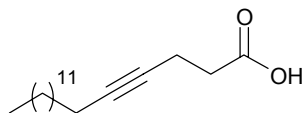

To a stirred solution of **16** (2.95 g, 11.1 mmol) in acetone (75 cm<sup>3</sup>) at 0°C was added Jones's reagent (6.0 cm<sup>3</sup>), prepared from CrO<sub>3</sub> (1.62 g, 16.2 mmol), concentrated H<sub>2</sub>SO<sub>4</sub> (1.38 cm<sup>3</sup>) and water (4.62 cm<sup>3</sup>). After 2 h oxidation, excess reagent was destroyed with propan-2-ol. The solution was neutralised with aqueous NaHCO<sub>3</sub>, and the solvent was removed *in vacuo*. The residue was dissolved in diethyl ether (300 cm<sup>3</sup>), and washed with a 2 M solution of HCl. The organic layer was collected, and the aqueous phase was extracted further with diethyl ether (3 x 200 cm<sup>3</sup>). The combined organic layers were washed with water (150 cm<sup>3</sup>), brine (150 cm<sup>3</sup>), dried (MgSO<sub>4</sub>), and concentrated. The residue was crystallised from hexane, to give the title compound as a white powder (2.17 g, 67%): R<sub>f</sub> 0.19 [hexane:EtOAc, 2:1];  $\nu_{\max}$  (nujol mull)/cm<sup>-1</sup> 2237, 1712;  $\delta_H$  (270 MHz; CDCl<sub>3</sub>) 0.86 (3 H, t, *J* 6.6, CH<sub>3</sub>), 1.17 - 1.38 (20 H, m, 10 x CH<sub>2</sub>), 1.44 (2 H, quin, *J* 6.9, CH<sub>2</sub>(CH<sub>2</sub>)<sub>10</sub>CH<sub>3</sub>), 2.08 - 2.13 (2 H, m, CH<sub>2</sub>(CH<sub>2</sub>)<sub>11</sub>CH<sub>3</sub>), 2.42 - 2.50 (2 H, m, CH<sub>2</sub>CH<sub>2</sub>CO<sub>2</sub>H), 2.51 - 2.56 (2 H, m, CH<sub>2</sub>CO<sub>2</sub>H);  $\delta_C$  (67.5 MHz; CDCl<sub>3</sub>) 14.17 (CH<sub>3</sub>), 14.53, 18.73, 22.77, 28.90, 28.99, 29.24, 29.45, 29.62, 29.74 (13 x CH<sub>2</sub>), 34.04 (CH<sub>2</sub>CO<sub>2</sub>H), 77.69, 81.45 (C≡C), 178.83 (CO<sub>2</sub>H); *m/z* (CI) 298 ([M + NH<sub>4</sub>]<sup>+</sup>, 94), 188 (12), 53 (41), 51 (7); found  $[M + NH_4]^+$ , 298.275103,  $C_{18}H_{36}NO_2$  requires  $[M + NH_4]^+$ , 298.274605.

*2-(12-Bromododecyl-1-oxy)tetrahydropyran (18).*

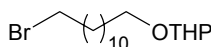

12-Bromododecan-1-ol (10.9 g, 41.1 mmol) was dissolved in anhydrous CH<sub>2</sub>Cl<sub>2</sub> (200 cm<sup>3</sup>) at 0°C, under Ar. To the stirred solution was added DHP (4.70 cm<sup>3</sup>, 51.4 mmol) and PPTS (1.33 g, 15 mol%). After 30 min, the reaction vessel was removed from the ice bath, and allowed to stir for 16 h at RT. The reaction mixture was neutralised with aqueous NaHCO<sub>3</sub> (150 cm<sup>3</sup>), and the organic phase was separated. The aqueous phase was re-extracted with CH<sub>2</sub>Cl<sub>2</sub> (2 x 100 cm<sup>3</sup>), and the combined organic layers were washed with water (100 cm<sup>3</sup>), brine (100 cm<sup>3</sup>), dried (Na<sub>2</sub>SO<sub>4</sub>), filtered, and concentrated *in vacuo*. The residue was purified by silica gel flash chromatography (hexane:EtOAc, 13:1) to furnish **18** as a pale-yellow oil (14.1 g, 98%): R<sub>f</sub> 0.34 [hexane:EtOAc, 9:1]; δ<sub>H</sub> (270 MHz; CDCl<sub>3</sub>) 1.20 - 1.44 (16 H, m, 8 x CH<sub>2</sub>), 1.45 - 1.60 (6 H, m, 3 x CH<sub>2</sub>), 1.61 - 1.89 (4 H, m, 2 x CH<sub>2</sub>), 3.32 - 3.41 (1 H, m, CH<sub>2</sub>O), 3.39 (2 H, t, *J* 6.8, CH<sub>2</sub>Br), 3.44 - 3.52 (1H, m, CH<sub>2</sub>O), 3.67- 3.76 (1 H, m, CH<sub>2</sub>O), 3.82 - 3.90 (1 H, m, CH<sub>2</sub>O), 4.56 (1 H, t, *J* 3.3, OCHO); δ<sub>C</sub> (100 MHz; CDCl<sub>3</sub>) 20.07, 25.90, 26.61 (3 x CH<sub>2</sub>), 28.55 (CH<sub>2</sub>CH<sub>2</sub>CH<sub>2</sub>Br), 29.14, 29.80, 29.85, 29.89, 29.92, 29.94, 30.13 (7 x CH<sub>2</sub>), 31.16 (CH<sub>2</sub>CHO), 34.34 (CH<sub>2</sub>Br), 62.67, 68.03 (2 x CH<sub>2</sub>O), 99.37 (OCHO); *m/z* (FAB<sup>+</sup>) 351 ([M + H]<sup>+</sup>, 5) 349 ([M + H]<sup>+</sup>, 8), 85 (100), 69 (22), 57 (22), 55 (29); found [M + H]<sup>+</sup>, 351.174248, C<sub>17</sub>H<sub>34</sub>O<sub>2</sub><sup>81</sup>Br requires [M + H]<sup>+</sup>, 351.172171; found [M – H]<sup>+</sup>, 347.159813, C<sub>17</sub>H<sub>32</sub>O<sub>2</sub><sup>79</sup>Br requires [M – H]<sup>+</sup>, 347.158567.

2-(12-Iodododecyl-1-oxy)tetrahydropyran (**19**).

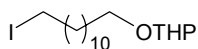

NaI (7.29 g, 48.6 mmol) was dissolved in a stirred solution of **18** (8.50 g, 24.3 mmol) in acetone (250 cm<sup>3</sup>) at RT. The reaction system was flushed with N<sub>2</sub>, and left under reflux for 20 h. The white precipitate was filtered off, and the reaction mixture was concentrated *in vacuo*. The resultant residue was dissolved in CH<sub>2</sub>Cl<sub>2</sub> (150 cm<sup>3</sup>), and washed with water (100 cm<sup>3</sup>). The organic layer was separated, and the aqueous layer was extracted further with CH<sub>2</sub>Cl<sub>2</sub> (2 x 150

cm<sup>3</sup>). The combined organic layers were washed with water (100 cm<sup>3</sup>), brine (100 cm<sup>3</sup>), dried (MgSO<sub>4</sub>), and concentrated *in vacuo*. The residue was subjected to silica gel flash column chromatography (hexane:EtOAc, 13:1) to afford the title compound (**19**) as a pale-yellow oil (7.75 g, 80%): R<sub>f</sub> 0.34 [hexane:EtOAc, 9:1]; δ<sub>H</sub> (270 MHz; CDCl<sub>3</sub>) 1.20 - 1.43 (16 H, m, 8 x CH<sub>2</sub>), 1.45 - 1.63 (6 H, m, 3 x CH<sub>2</sub>), 1.64 - 1.88 (4 H, m, 2 x CH<sub>2</sub>), 3.17 (2H, t, *J* 7.0, CH<sub>2</sub>l), 3.32 - 3.40 (1 H, m, CH<sub>2</sub>O), 3.45 - 3.52 (1 H, m, CH<sub>2</sub>O), 3.67 - 3.76 (1 H, m, CH<sub>2</sub>O), 3.81 - 3.90 (1 H, m, CH<sub>2</sub>O), 4.56 (1 H, t, *J* 3.5, OCHO); δ<sub>C</sub> (400 MHz; CDCl<sub>3</sub>) 7.66 (CH<sub>2</sub>l), 20.08, 25.91, 26.62, 28.93, 29.79, 29.86, 29.90, 29.92, 29.94, 30.13 (10 x CH<sub>2</sub>), 30.89 (CH<sub>2</sub>CH<sub>2</sub>CH<sub>2</sub>l), 31.17 (CH<sub>2</sub>CHO), 33.95 (CH<sub>2</sub>CH<sub>2</sub>l), 62.67, 68.03 (CH<sub>2</sub>O), 99.17 (OCHO); *m/z* (FAB<sup>+</sup>) 397 ([M + H]<sup>+</sup>, 6), 395 ([M - H]<sup>+</sup>, 4), 85 (100), 69 (30), 67 (19), 57 (28), 55 (39); found [M + H]<sup>+</sup>, 397.160049, C<sub>17</sub>H<sub>32</sub>O<sub>2</sub>l requires [M + H]<sup>+</sup>, 397.160358; found [M - H]<sup>+</sup>, 395.144836, C<sub>17</sub>H<sub>32</sub>O<sub>2</sub>l requires [M - H]<sup>+</sup>, 395.144708.

2-(Heptadec-13-ynyl-1-oxy)tetrahydropyran (**20**).

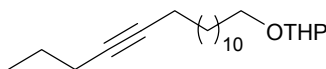

To a stirred solution of 1-pentyne (2.25 cm<sup>3</sup>, 22.9 mmol) in anhydrous THF (40 cm<sup>3</sup>) at 0°C, under a N<sub>2</sub> atmosphere, was added *n*-BuLi (1.80 M in hexanes; 14.3 cm<sup>3</sup>, 25.7 mmol) dropwise. After 15 min, HMPA (40 cm<sup>3</sup>) was added to the bright yellow solution, turning the reaction mixture caramel in colour. After a further 15 min, **19** (7.55 g, 19.0 mmol) was added with anhydrous THF (20 cm<sup>3</sup>), turning the solution yellow-orange, through blue-green. Within 1.5 h, the solution had turned darker in colour. The reaction mixture was allowed to stir at RT for a further 48 h, then poured onto an ice / water mixture (200 cm<sup>3</sup>). Crude **20** was extracted with diethyl ether (3 x 200 cm<sup>3</sup>), and the combined organic layers were combined, washed with water (100 cm<sup>3</sup>), brine (100 cm<sup>3</sup>), dried (Na<sub>2</sub>SO<sub>4</sub>), and concentrated. The crude residue was purified by flash column chromatography of the residue

(hexane:EtOAc, 20:1) to yield **20** as a pale-yellow oil (3.76 g, 59%):  $R_f$  0.19 [hexane:EtOAc, 30:1];  $\delta_H$  (270 MHz;  $CDCl_3$ ) 0.95 (3 H, t,  $J$  7.3,  $CH_3$ ), 1.21 - 1.40 (16 H, m, 8 x  $CH_2$ ), 1.41 - 1.64 (10 H, m, 5 x  $CH_2$ ), 1.65 - 1.89 (2 H, 2 m,  $CH_2$ ), 2.06 - 2.16 (4 H, m,  $CH_2C\equiv CCH_2$ ), 3.32 - 3.41 (1 H, m,  $CH_2O$ ), 3.44 - 3.52 (1 H, m,  $CH_2O$ ), 3.67 - 3.76 (1 H, m,  $CH_2O$ ), 3.82 - 3.90 (1 H, m,  $CH_2O$ ), 4.56 (1 H, t,  $J$  3.6, OCHO);  $\delta_C$  (100 MHz;  $CDCl_3$ ) 13.17 ( $CH_3$ ), 18.02, 19.15, 20.00, 22.83, 25.91, 26.66, 29.23, 29.54, 29.87, 29.89, 29.96, 30.11 (15  $CH_2$ ), 31.22 ( $CH_2CHO$ ), 62.59, 68.12 (2 x  $CH_2O$ ), 80.01, 80.33 ( $C\equiv C$ ), 99.23 (OCHO);  $m/z$  (FAB<sup>+</sup>) 337 ([ $M + H$ ]<sup>+</sup>, 4), 335 (3), 238 (4), 85 (100), 81 (10), 69 (9), 67 (11), 57 (8), 55 (15); found [ $M - H$ ]<sup>+</sup>, 335.295944,  $C_{22}H_{39}O_2$  requires [ $M - H$ ]<sup>+</sup>, 335.295006.

*1-Bromoheptadec-13-yne (21).*

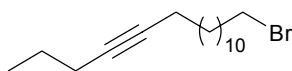

To a stirred solution of  $PPh_3Br_2$  (5.87 g, 13.9 mmol) and  $PPh_3$  (1.41 g, 5.36 mmol) in anhydrous  $CH_2Cl_2$  (150  $cm^3$ ) at 0°C, under  $N_2$  was added **20** (3.61 g, 10.7 mmol). After 15 min, excess  $PPh_3Br_2$  was destroyed with 10%  $K_2CO_3$  solution. The organic phase was separated, and the aqueous phase was re-extracted with  $CH_2Cl_2$  (3 x 150  $cm^3$ ). The combined organic layers were washed with water (150  $cm^3$ ), brine (150  $cm^3$ ), dried ( $MgSO_4$ ), filtered, and concentrated. Crude **21** was subjected to silica gel column chromatography (100% hexane → 95% hexane:EtOAc → 90% hexane:EtOAc) to furnish the title compound as an 84% pure pale-yellow oil (3.02 g, 90%):  $R_f$  0.61 [hexane:EtOAc, 9:2];  $\nu_{max}$  (nujol mull)/ $cm^{-1}$  2199;  $\delta_H$  (300 MHz;  $CDCl_3$ ) 0.99 (3 H, t,  $J$  7.4,  $CH_3$ ), 1.24 - 1.58 (18 H, 2 m, 9 x  $CH_2$ ), 1.50 (2 H, sextet,  $J$  7.1,  $CH_2CH_3$ ), 1.87 (2 H, quin,  $J$  7.2,  $CH_2CH_2Br$ ), 2.11 - 2.21 (4 H, m,  $CH_2C\equiv CCH_2$ ), 3.43 (2 H, t,  $J$  6.9,  $CH_2Br$ );  $\delta_C$  (400 MHz,  $CDCl_3$ ) 13.37 ( $CH_3$ ), 18.69, 20.88, 22.61, 25.01 ( $CH_3CH_2CH_2C\equiv CCH_2$ ,  $CH_2$ ), 28.59, 29.17, 29.31, 29.55, 29.87, 29.91, 29.98,

30.19 (8 x CH<sub>2</sub>), 33.23 (CH<sub>2</sub>CH<sub>2</sub>Br), 34.22 (CH<sub>2</sub>Br), 80.01, 80.42 (C≡C); *m/z* (EI) 316 (M<sup>+</sup>, 0.33), 314 (M<sup>+</sup>, 0.45), 109 (38), 95 (77), 82 (43), 81 (100), 67 (100), 56 (47), 55 (54), 49 (58), 41 (78).

Octadec-14-yne nitrile (**22**).

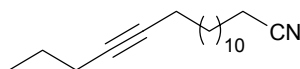

NaCN (0.61 g, 12.5 mmol) was dissolved in a stirred solution of **21** (3.02 g, 9.58 mmol) in anhydrous DMF (150 cm<sup>3</sup>), under Ar. The reaction mixture was allowed to stir for 16 h at 60°C, then poured into water (300 cm<sup>3</sup>). Crude **22** was extracted into benzene (500 cm<sup>3</sup>, then 4 x 100 cm<sup>3</sup>). The combined organic layers were washed with water (100 cm<sup>3</sup>), brine (100 cm<sup>3</sup>), dried (MgSO<sub>4</sub>), filtered, and concentrated *in vacuo*. The residue was purified by silica gel column chromatography (hexane:EtOAc, 9:1) to afford the title nitrile as a pale-yellow oil (1.99 g, 95%): R<sub>f</sub> 0.44 [hexane:EtOAc, 3:1]; ν<sub>max</sub> (nujol mull)/cm<sup>-1</sup> 2359, 2246; δ<sub>H</sub> (300 MHz; CDCl<sub>3</sub>) 0.98 (3 H, t, *J* 7.4, CH<sub>3</sub>), 1.24 - 1.58 (18 H, m, 9 x CH<sub>2</sub>), 1.49 (2 H, sextet, *J* 7.1, CH<sub>2</sub>CH<sub>3</sub>), 1.67 (2 H, quin, *J* 7.3, CH<sub>2</sub>CH<sub>2</sub>CH<sub>3</sub>), 2.10 - 2.21 (4 H, m, CH<sub>2</sub>C≡CCH<sub>2</sub>), 2.35 (2 H, t, *J* 7.1, CH<sub>2</sub>CN); δ<sub>C</sub> (100 MHz; CDCl<sub>3</sub>), 12.47 (CH<sub>3</sub>), 16.10, 17.75, 19.77, 21.57, 24.39 (CH<sub>3</sub>CH<sub>2</sub>CH<sub>2</sub>C≡CCH<sub>2</sub>, CH<sub>2</sub>CH<sub>2</sub>CN), 27.66, 27.78, 27.84, 28.15, 28.18, 28.31, 28.49, 28.51, 28.53 (9 x CH<sub>2</sub>), 78.97, 79.32 (C≡C), 118.82 (CN); *m/z* (FAB<sup>+</sup>) 262 ([M + H]<sup>+</sup>, 100), 95 (30), 81 (43), 77 (33), 67 (39), 55 (55), 41 (40); found [M + H]<sup>+</sup>, 262.254333, C<sub>18</sub>H<sub>32</sub>N requires [M + H]<sup>+</sup>, 262.253475.

Octadec-14-ynoic acid (**23**).

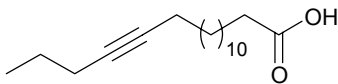

To a stirred solution of nitrile **21** (1.83 g, 7.00 mmol) in ethanol (2 cm<sup>3</sup>) was added 25 N NaOH solution (1 cm<sup>3</sup>). The reaction mixture was stirred under reflux until no further evolution of ammonia gas could be detected (3 h), then poured onto an ice-water mixture (200 cm<sup>3</sup>), and acidified to pH 2 with concentrated aqueous HCl. The crude title acid was extracted into diethyl ether (3 x 200 cm<sup>3</sup>), and the combined organic layers were washed with water (100 cm<sup>3</sup>), brine (100 cm<sup>3</sup>), dried (MgSO<sub>4</sub>), filtered, and concentrated, affording **23** in >95% purity. Crystallisation from hexane gave pure **23** as a white powder (1.85 g, 94%): R<sub>f</sub> 0.38 [hexane:EtOAc, 2:1]; ν<sub>max</sub> (nujol mull)/cm<sup>-1</sup> 2273, 1706; δ<sub>H</sub> (270 MHz; CDCl<sub>3</sub>) 0.95 (3 H, t, *J* 7.3, CH<sub>3</sub>), 1.17 - 1.55 (18 H, 2 m, 9 x CH<sub>2</sub>), 1.47 (2 H, sex, *J* 7.2, CH<sub>2</sub>CH<sub>3</sub>), 1.61 (2 H, quin, *J* 7.0, CH<sub>2</sub>CH<sub>2</sub>CO<sub>2</sub>H), 2.06 - 2.20 (4 H, m, CH<sub>2</sub>C≡CCH<sub>2</sub>), 2.33 (2 H, t, *J* 7.4, CH<sub>2</sub>CO<sub>2</sub>H); δ<sub>C</sub> (67.5 MHz; CDCl<sub>3</sub>) 13.51 (CH<sub>2</sub>), 18.80, 20.82, 22.62, 24.72 (CH<sub>3</sub>CH<sub>2</sub>CH<sub>2</sub>C≡CCH<sub>2</sub>, CH<sub>2</sub>CH<sub>2</sub>CO<sub>2</sub>H), 28.91, 29.12, 29.22, 29.30, 29.49, 29.63 (9 x CH<sub>2</sub>), 34.19 (CH<sub>2</sub>CO<sub>2</sub>H), 80.04, 80.42 (C≡C), 180.67 (CO<sub>2</sub>H); *m/z* (CI) 298 ([M + NH<sub>4</sub>]<sup>+</sup>, 100), 297 (48), 242 (19), 83 (14), 81 (23), 58 (13); found [M + NH<sub>4</sub>]<sup>+</sup>, 298.275163, C<sub>18</sub>H<sub>36</sub>NO<sub>2</sub> requires [M + NH<sub>4</sub>]<sup>+</sup>, 298.274605.

*Di(octadec-9-ynoyl)phosphatidylcholine* (DS(9-yne)PC, **11**).

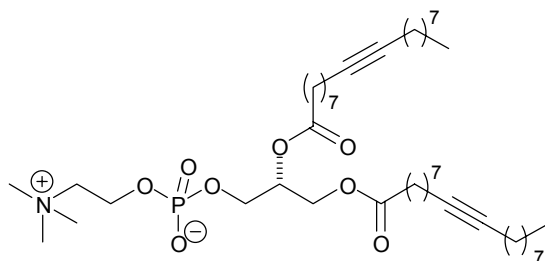

To a stirred solution of octadec-9-ynoic acid (**9**; 680 mg, 2.43 mmol) in anhydrous  $\text{CHCl}_3$  (10  $\text{cm}^3$ ) was added CDI (491 mg, 3.03 mmol) under a  $\text{N}_2$  atmosphere at RT. Meanwhile, GPC (**10**; 401 mg, 0.91 mmol) was dissolved in DMSO (10  $\text{cm}^3$ ), with a little heating. DBU (363  $\mu\text{l}$ , 2.43 mmol) was then added. The  $\text{CHCl}_3$  solution was transferred to the DMSO solution *via* a cannular with further  $\text{CHCl}_3$  (2  $\text{cm}^3$ ). Periodically, the reaction mixture was warmed in a water bath to approximately  $40^\circ\text{C}$ , for about 20 min. After stirring for 24 h at RT, the crude reaction mixture was neutralised with 0.1 M acetic acid (30  $\text{cm}^3$ ), then extracted into a 2:1 mixture of  $\text{CHCl}_3$ :MeOH (total volume 150  $\text{cm}^3$ ), and washed with a 1:1 mixture of  $\text{H}_2\text{O}$ :MeOH (100  $\text{cm}^3 \rightarrow$  250  $\text{cm}^3$  stepwise, over five washes), back-extracting each time. The subsequent organic fractions were combined, and concentrated *in vacuo*, azeotroping the water and methanol with chloroform. The residual orange-brown, viscous oil was purified by silica gel flash column chromatography (solvent A), to give DS(9-yne)PC (**9**) as an off-white, waxy solid (473 mg, 67%):  $R_f$  0.47 [solvent B];  $\nu_{\text{max}}$  (nujol mull)/ $\text{cm}^{-1}$  2237, 1709, 1626, 1451, 1279, 1246;  $\delta_{\text{H}}$  (270 MHz;  $\text{CDCl}_3$ ) 0.81 (6 H, t,  $J$  6.8, 2 x  $\text{CH}_2\text{CH}_3$ ), 1.17 – 1.58 (44 H, 2 m, 20 x  $\text{CH}_2$ , 2 x  $\text{CH}_2\text{CH}_2\text{CO}_2$ ), 2.04 – 2.11 (8 H, m, 2 x  $\text{CH}_2\text{C}\equiv\text{CCH}_2\text{CH}_2\text{CO}_2$ ), 2.36 – 2.57 (8 H, m, 2 x  $\text{CH}_2\text{CH}_2\text{CO}_2$ ), 3.33 (9 H, s,  $\text{N}(\text{CH}_3)_3$ ), 3.74 (2 H, m,  $\text{CH}_2\text{N}(\text{CH}_3)_3$ ), 3.87 (2 H, m, glycerol-C3- $\text{H}_{\text{a,b}}$ ), 4.05 (1 H, dd,  $^2J$  12.0,  $^3J$  7.2, glycerol-C1- $\text{H}_{\text{b}}$ ), 4.24 (2 H, m,  $\text{CH}_2\text{CH}_2\text{N}(\text{CH}_3)_3$ ), 4.33 (1 H, dd,  $^2J$  12.0,  $^3J$  2.4, glycerol-C1- $\text{H}_{\text{a}}$ ), 5.13 (1 H, m, glycerol-C2-H);  $\delta_{\text{C}}$  (100 MHz;  $\text{CDCl}_3$ ) 14.49 (2 x  $\text{CH}_2\text{CH}_3$ ), 19.13, 23.04, 25.21, 25.29, 29.10, 29.27, 29.40, 29.44, 29.51, 29.55, 29.60, 32.22 (26 x  $\text{CH}_2$ ), 34.45, 34.65 (2 x  $\text{CH}_2\text{CO}_2$ ), 54.75

(N(CH<sub>3</sub>)<sub>3</sub>), 59.68 (d, *J* 4.4, POCH<sub>2</sub>CH<sub>2</sub>N(CH<sub>3</sub>)<sub>3</sub>), 63.38 (POCH<sub>2</sub>CHCH<sub>2</sub>), 63.70 (d, *J*<sub>CP</sub> 4.9, POCH<sub>2</sub>CH<sub>2</sub>N(CH<sub>3</sub>)<sub>3</sub>), 66.70 (d, *J*<sub>CP</sub> 5.9, POCH<sub>2</sub>CHCH<sub>2</sub>), 70.90 (d, *J*<sub>CP</sub> 7.6, POCH<sub>2</sub>CHCH<sub>2</sub>), 80.39, 80.69 (2 x C≡C), 173.51, 173.87 (2 x CO<sub>2</sub>); *m/z* (FAB<sup>+</sup>) 782 ([M + H]<sup>+</sup>, 35), 184 ([C(CH<sub>3</sub>)<sub>3</sub>NCH<sub>2</sub>CH<sub>2</sub>OPO<sub>3</sub>H + H]<sup>+</sup>, 100); found [M + H]<sup>+</sup>, 782.571487, C<sub>44</sub>H<sub>81</sub>NO<sub>8</sub>P requires [M + H]<sup>+</sup>, 782.569983; HPLC *t*<sub>R</sub> = 11.5 min.

*Di(octadec-4-ynoyl)phosphatidylcholine* (DS(4-yne)PC, **24**).

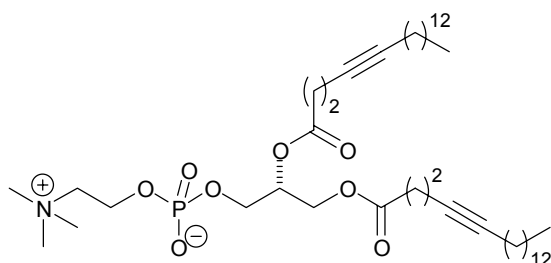

To a stirred solution of octadec-4-ynoic acid (**17**; 562 mg, 2.00 mmol) in anhydrous CHCl<sub>3</sub> (13 cm<sup>3</sup>) was added CDI (405 mg, 2.49 mmol) under N<sub>2</sub> at RT. Meanwhile GPC (**10**; 330 mg, 0.75 mmol) was dissolved in DMSO (13 cm<sup>3</sup>), with a little heating. To this solution was added DBU (300 μl, 2.00 mmol). The CHCl<sub>3</sub> solution was transferred to the DMSO solution *via* a cannular with further CHCl<sub>3</sub> (2 cm<sup>3</sup>). After 7 h, the crude reaction mixture was neutralised with 0.1 M acetic acid (30 cm<sup>3</sup>), then extracted into a 2:1 mixture of CHCl<sub>3</sub>:MeOH (total volume 150 cm<sup>3</sup>), and washed with a 1:1 mixture of H<sub>2</sub>O:MeOH (100 cm<sup>3</sup> → 250 cm<sup>3</sup> stepwise, over five washes), back-extracting each time. The subsequent organic fractions were combined, and concentrated *in vacuo*, azeotroping the water and methanol with benzene. The residual orange-brown, viscous oil was purified by silica gel flash column chromatography (solvent A), to afford DS(4-yne)PC (**24**) as a pale yellow, waxy solid (335 mg, 57%): *R*<sub>f</sub> 0.45 [solvent B]; *v*<sub>max</sub> (nujol mull)/cm<sup>-1</sup> 2235, 1723, 1683, 1424, 1373, 1235; δ<sub>H</sub> (270 MHz; CDCl<sub>3</sub>) 0.86 (6 H, t, *J* 6.5, 2 x CH<sub>2</sub>CH<sub>3</sub>), 1.15 – 1.49 (44 H, 2 m, 20 x CH<sub>2</sub>, 2 x (CH<sub>2</sub>)<sub>10</sub>CH<sub>2</sub>CH<sub>2</sub>C≡C), 2.05 – 2.14 (4 H, m, 2 x C≡CCH<sub>2</sub>CH<sub>2</sub>CO<sub>2</sub>), 2.36 – 2.57 (8 H, m, 2 x CH<sub>2</sub>CH<sub>2</sub>CO<sub>2</sub>),



3.33 (9 H, s, N(CH<sub>3</sub>)<sub>3</sub>) 3.77 (2 H, m, CH<sub>2</sub>N(CH<sub>3</sub>)<sub>3</sub>), 3.92 (2 H, m, glycerol-C3-H<sub>a,b</sub>), 4.14 (1 H, dd, <sup>2</sup>J 11.9, <sup>3</sup>J 7.2, glycerol-C1-H<sub>b</sub>), 4.34 – 4.42 (2 H, m, CH<sub>2</sub>CH<sub>2</sub>N(CH<sub>3</sub>)<sub>3</sub>), 4.38 (1 H, dd, <sup>2</sup>J 12.1, <sup>3</sup>J 2.7, glycerol-C1-H<sub>a</sub>), 5.20 (1 H, m, glycerol-C2-H); δ<sub>C</sub> (100 MHz; CDCl<sub>3</sub>) 14.50 (2 x CH<sub>2</sub>CH<sub>3</sub>), 15.00, 15.07, 19.11, 23.07, 29.35, 29.37, 29.43, 29.45, 29.61, 29.75, 29.98, 30.05, 30.08, 32.30 (26 x CH<sub>2</sub>), 34.43, 34.26 (2 x CH<sub>2</sub>CO<sub>2</sub>), 54.68 (N(CH<sub>3</sub>)<sub>3</sub>), 59.70 (d, J 3.9, POCH<sub>2</sub>CH<sub>2</sub>N(CH<sub>3</sub>)<sub>3</sub>), 63.50 (POCH<sub>2</sub>CHCH<sub>2</sub>), 63.65 (d, J<sub>CP</sub> 4.7, POCH<sub>2</sub>CH<sub>2</sub>N(CH<sub>3</sub>)<sub>3</sub>), 66.64 (d, J<sub>CP</sub> 6.5, POCH<sub>2</sub>CHCH<sub>2</sub>), 71.17 (d, J<sub>CP</sub> 7.0, POCH<sub>2</sub>CHCH<sub>2</sub>), 78.18, 81.61, 81.64 (2 x C≡C), 171.99, 172.32 (2 x CO<sub>2</sub>); m/z (FAB<sup>+</sup>) 782 ([M + H]<sup>+</sup>, 52), 184 ([C(CH<sub>3</sub>)<sub>3</sub>NCH<sub>2</sub>CH<sub>2</sub>OPO<sub>3</sub>H + H]<sup>+</sup>, 100), 86 (47), 58 (35); found [M + H]<sup>+</sup>, 782.572556, C<sub>44</sub>H<sub>81</sub>NO<sub>8</sub>P requires [M + H]<sup>+</sup>, 782.569983; HPLC t<sub>R</sub> = 11.5 min.

*Di(octadec-14-ynoyl)phosphatidylcholine* (DS(14-yne)PC, **25**).

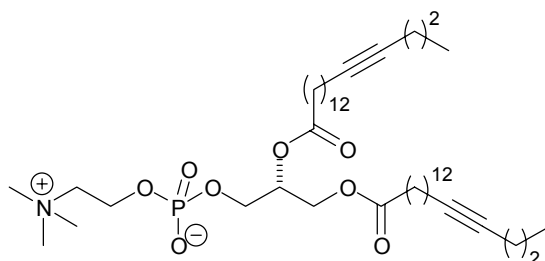

To a stirred solution of octadec-14-ynoic acid (**23**; 680 mg, 2.43 mmol) in anhydrous CHCl<sub>3</sub> (10 cm<sup>3</sup>) was added CDI (491 mg, 3.03 mmol) under a N<sub>2</sub> atmosphere at RT. Meanwhile, GPC (**10**; 401 mg, 0.91 mmol) was dissolved in DMSO (10 cm<sup>3</sup>), with a little heating. DBU (363 μl, 2.43 mmol) was then added. The CHCl<sub>3</sub> solution was transferred to the DMSO solution *via* a cannular with further CHCl<sub>3</sub> (2 cm<sup>3</sup>). Periodically, the reaction mixture was warmed in a water bath to approximately 40°C, for about 20 min. After stirring for 24 h at RT, the crude reaction mixture was worked up as for **11**. The residual orange-brown, viscous oil was purified by silica gel flash column chromatography (solvent A), to yield DO(14-yne)PC (**25**) as a pale yellow, waxy solid (420 mg, 59%): R<sub>f</sub> 0.44

[solvent B];  $\nu_{\max}$  (nujol mull)/ $\text{cm}^{-1}$  2269, 1701, 1672, 1497, 1322;  $\delta_{\text{H}}$  (270 MHz;  $\text{CDCl}_3$ ) 0.94 (6 H, t,  $J$  7.4, 2 x  $\text{CH}_2\text{CH}_3$ ), 1.17 – 1.62 (44 H, 2 m, 18 x  $\text{CH}_2$ , 2 x  $\text{CH}_2\text{CH}_3$ , 2 x  $\text{CH}_2\text{CH}_2\text{CO}_2$ ), 2.05 – 2.18 (8 H, m, 2 x  $\text{CH}_2\text{C}\equiv\text{CCH}_2$ ), 2.25 – 2.31 (4 H, m, 2 x  $\text{CH}_2\text{CO}_2$ ), 3.33 (9 H, s,  $\text{N}(\text{CH}_3)_3$ ), 3.81 (2 H, m,  $\text{CH}_2\text{N}(\text{CH}_3)_3$ ), 3.93 (2 H, m, glycerol-C3- $\text{H}_{\text{a,b}}$ ), 4.10 (1 H, dd,  $^2J$  11.9,  $^3J$  7.4, glycerol-C1- $\text{H}_{\text{b}}$ ), 4.30 (2 H, m,  $\text{CH}_2\text{CH}_2\text{N}(\text{CH}_3)_3$ ), 4.37 (1 H, dd,  $^2J$  12.1,  $^3J$  2.7, glycerol-C1- $\text{H}_{\text{a}}$ ), 5.18 (1 H, m, glycerol-C2- $\text{H}$ );  $\delta_{\text{C}}$  (100 MHz;  $\text{CDCl}_3$ ) 13.85 (2 x  $\text{CH}_2\text{CH}_3$ ), 19.12, 21.14, 22.92, 25.27, 25.35, 29.26, 29.57, 29.68, 29.73, 29.76, 29.87, 29.96, 30.04 (26 x  $\text{CH}_2$ ), 34.50, 34.69 (2 x  $\text{CH}_2\text{CO}_2$ ), 54.67 ( $\text{N}(\text{CH}_3)_3$ ), 59.71 (d,  $J$  4.6,  $\text{POCH}_2\text{CH}_2\text{N}(\text{CH}_3)_3$ ), 63.36 ( $\text{POCH}_2\text{CHCH}_2$ ), 63.71 (d,  $J_{\text{CP}}$  4.8,  $\text{POCH}_2\text{CH}_2\text{N}(\text{CH}_3)_3$ ), 66.62 (d,  $J_{\text{CP}}$  6.5,  $\text{POCH}_2\text{CHCH}_2$ ), 70.86 (d,  $J_{\text{CP}}$  7.5,  $\text{POCH}_2\text{CHCH}_2$ ), 80.37, 80.73 (2 x  $\text{C}\equiv\text{C}$ ), 173.54, 173.90 (2 x  $\text{CO}_2$ );  $m/z$  ( $\text{FAB}^+$ ) 782 ( $[\text{M} + \text{H}]^+$ , 40), 184 ( $[(\text{CH}_3)_3\text{NCH}_2\text{CH}_2\text{OPO}_3\text{H} + \text{H}]^+$ , 100), 86 (38), 58 (37); found  $[\text{M} + \text{H}]^+$ , 782.568970,  $\text{C}_{44}\text{H}_{81}\text{NO}_8\text{P}$  requires  $[\text{M} + \text{H}]^+$ , 782.569983; HPLC  $t_{\text{R}} = 11.5$  min.

*Di(octadec-9-ynoyl)phosphatidylethanolamine* (DS(9-yne)PE, **3**).

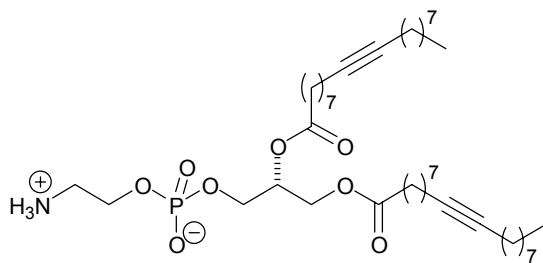

A solution of ethanolamine (110  $\mu\text{l}$ , 1.50 mmol) in a 100 mM NaOAc / 50 mM  $\text{CaCl}_2$  buffer (0.795  $\text{cm}^3$ ) at pH 6.5 (pH adjusted with acetic acid), was added to a stirred solution of **11** (237 mg, 0.303 mmol) in  $\text{CHCl}_3$  (6  $\text{cm}^3$ ) at 30°C. To this biphasic system was added PLD (175 units in 700  $\mu\text{l}$  of the aforementioned buffer, pH 6.5), and the reaction mixture was allowed to stir at 30°C for 3 h. The crude organic material was extracted by washing with  $\text{CHCl}_3$ :MeOH, 2:1 (30  $\text{cm}^3$  x 3). The organic layers were combined and washed with  $\text{H}_2\text{O}$  (15  $\text{cm}^3$ ), then

concentrated *in vacuo*, and subjected to silica gel flash column chromatography (solvent A) to purify. This afforded the title compound, **3**, as a very pale-yellow, waxy solid (211 mg, 94%):  $R_f$  0.58 [solvent B];  $\nu_{\max}$  (nujol mull)/ $\text{cm}^{-1}$  2219, 1709, 1431, 1274, 1072;  $\delta_{\text{H}}$  (270 MHz;  $\text{CDCl}_3$ ) 0.81 (6 H, t,  $J$  6.8, 2 x  $\text{CH}_2\text{CH}_3$ ), 1.15 – 1.59 (44 H, 2 m, 22 x  $\text{CH}_2$ ), 2.03 – 2.13 (8 H, m, 2 x  $\text{CH}_2\text{C}\equiv\text{CCH}_2$ ), 2.19 – 2.30 (4 H, m, 2 x  $\text{CH}_2\text{CO}_2$ ), 3.09 (2 H, m,  $\text{CH}_2\text{NH}_3$ ), 3.88 (2 H, m, glycerol-C3- $\text{H}_{\text{a,b}}$ ), 4.02 (2 H, m,  $\text{CH}_2\text{CH}_2\text{NH}_3$ ), 4.07 (1 H, dd,  $^2J$  12.0,  $^3J$  6.8, glycerol-C1- $\text{H}_{\text{b}}$ ), 4.32 (1 H, dd,  $^2J$  11.6,  $^3J$  2.4, glycerol-C1- $\text{H}_{\text{a}}$ ), 5.15 (1 H, m, glycerol-C2-H), 8.20 – 8.45 (br s,  $\text{NH}_3$ );  $\delta_{\text{C}}$  (100 MHz;  $\text{CDCl}_3$ ) 14.49 (2 x  $\text{CH}_2\text{CH}_3$ ), 19.14, 23.05, 25.20, 25.27, 29.15, 29.28, 29.43, 29.47, 29.52, 29.57, 29.61, 32.23 (26 x  $\text{CH}_2$ ), 34.40, 34.60 (2 x  $\text{CH}_2\text{CO}_2$ ), 40.80 ( $\text{CH}_2\text{NH}_3$ ), 62.59 (m,  $\text{POCH}_2\text{CH}_2\text{NH}_3$ ) 62.97 (m,  $\text{POCH}_2\text{CHCH}_2$ ), 64.28 (d,  $J_{\text{CP}}$  4.0,  $\text{POCH}_2\text{CHCH}_2$ ), 70.67 (d,  $J_{\text{CP}}$  7.4,  $\text{POCH}_2\text{CHCH}_2$ ), 80.37, 80.66 (2 x  $\text{C}\equiv\text{C}$ ), 173.73, 173.45 (2 x  $\text{CO}_2$ );  $m/z$  ( $\text{FAB}^+$ ) 740 ( $[\text{M} + \text{H}]^+$ , 9), 600 (8), 599 (28), 44 (100); found  $[\text{M} + \text{H}]^+$ , 740.523073,  $\text{C}_{41}\text{H}_{75}\text{NO}_8\text{P}$  requires  $[\text{M} + \text{H}]^+$ , 740.523033; HPLC  $t_{\text{R}} = 4.3$  min.

*Di(octadec-4-ynoyl)phosphatidylethanolamine* (DS(4-yne)PE, **2**).

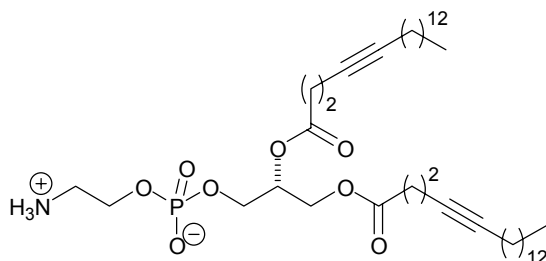

A solution of ethanolamine (91  $\mu\text{l}$ , 1.50 mmol) in a 100 mM NaOAc / 50 mM  $\text{CaCl}_2$  buffer (0.625  $\text{cm}^3$ ) at pH 6.5 (pH adjusted with acetic acid), was added to a stirred solution of **24** (193 mg, 0.25 mmol) in  $\text{CHCl}_3$  (5  $\text{cm}^3$ ) at 30°C. To this biphasic system was added PLD (110 units in 440  $\mu\text{l}$  of the aforementioned buffer, pH 6.5), and the reaction mixture was allowed to stir at 30°C for 3 h. Further PLD (35 units) was added. After 10 h, the aqueous phase was diluted to 15  $\text{cm}^3$ , and the crude organic material was extracted by washing with

CHCl<sub>3</sub>:MeOH, 2:1 (30 cm<sup>3</sup> x 3). The organic layers were combined and washed with H<sub>2</sub>O (15 cm<sup>3</sup>), then concentrated *in vacuo*, and subjected to silica gel flash column chromatography (solvent A) to purify. This furnished **2** as a very pale-yellow, waxy solid (170 mg, 92%): R<sub>f</sub> 0.56 [solvent B]; ν<sub>max</sub> (nujol mull)/cm<sup>-1</sup> 2238, 1714, 1424, 1291, 1101; δ<sub>H</sub> (270 MHz; CDCl<sub>3</sub>) 0.81 (6 H, t, *J* 6.7, 2 x CH<sub>2</sub>CH<sub>3</sub>), 1.15 – 1.31 (40 H, 2 m, 20 x CH<sub>2</sub>), 1.35 – 1.43 (4 H, m, 2 x (CH<sub>2</sub>)<sub>10</sub>CH<sub>2</sub>CH<sub>2</sub>C≡C), 2.01 – 2.06 (4 H, m, 2 x (CH<sub>2</sub>)<sub>11</sub>CH<sub>2</sub>C≡C), 2.34 – 2.41 (4 H, m, 2 x CH<sub>2</sub>CH<sub>2</sub>CO<sub>2</sub>), 2.42 – 2.49 (4 H, m, 2 x CH<sub>2</sub>CO<sub>2</sub>), 3.05 – 3.13 (2 H, m, CH<sub>2</sub>NH<sub>3</sub>), 3.85 – 3.91 (2 H, m, glycerol-C3-H<sub>a,b</sub>), 3.97 – 4.05 (2 H, m, CH<sub>2</sub>CH<sub>2</sub>NH<sub>3</sub>), 4.12 (1 H, dd, <sup>2</sup>*J* 12.0, <sup>3</sup>*J* 6.4, glycerol-C1-H<sub>b</sub>), 4.33 (1 H, dd, <sup>2</sup>*J* 11.8, <sup>3</sup>*J* 2.6, glycerol-C1-H<sub>a</sub>), 5.17 (1 H, m, glycerol-C2-H), 8.20 – 8.60 (br s, NH<sub>3</sub>); δ<sub>C</sub> (100 MHz; CDCl<sub>3</sub>) 14.51 (2 x CH<sub>2</sub>CH<sub>3</sub>), 15.00, 15.06, 19.13, 23.09, 29.39, 29.42, 29.46, 29.49, 29.63, 29.65, 29.77, 30.00, 30.02, 30.07, 30.12, 32.33 (26 x CH<sub>2</sub>), 34.25, 34.39 (2 x CH<sub>2</sub>CO<sub>2</sub>), 40.84 (CH<sub>2</sub>NH<sub>3</sub>), 62.63 (m, POCH<sub>2</sub>CH<sub>2</sub>NH<sub>3</sub>) 63.11 (m, POCH<sub>2</sub>CHCH<sub>2</sub>), 64.17 (d, *J*<sub>CP</sub> 5.5, POCH<sub>2</sub>CHCH<sub>2</sub>), 70.93 (d, *J*<sub>CP</sub> 6.9, POCH<sub>2</sub>CHCH<sub>2</sub>), 78.13, 78.19, 81.61, 81.66 (2 x C≡C), 171.96, 172.21 (2 x CO<sub>2</sub>); *m/z* (FAB<sup>+</sup>) 740 ([M + H]<sup>+</sup>, 7), 600 (10), 599 (24), 44 (100); found [M + H]<sup>+</sup>, 740.523087, C<sub>41</sub>H<sub>75</sub>NO<sub>8</sub>P requires [M + H]<sup>+</sup>, 740.523033; HPLC *t*<sub>R</sub> = 4.3 min.

*Di(octadec-14-ynoyl)phosphatidylethanolamine* (DS(14-yne)PE, **4**).

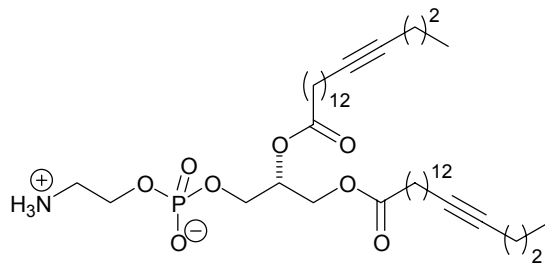

A solution of ethanolamine (102 μl, 1.69 mmol) in a 100 mM NaOAc / 50 mM CaCl<sub>2</sub> buffer (0.64 cm<sup>3</sup>) at pH 6.5 (pH adjusted with acetic acid), was added to a stirred solution of **25** (220 mg, 0.28 mmol) in CHCl<sub>3</sub> (5 cm<sup>3</sup>) at 30°C. To this biphasic system was added PLD (160 units in 640 μl of the aforementioned

buffer, pH 6.5), and the reaction mixture was allowed to stir at 30°C for 4 h. The aqueous phase was diluted to 15 cm<sup>3</sup>, and the crude organic material was extracted by washing with CHCl<sub>3</sub>:MeOH, 2:1 (30 cm<sup>3</sup> x 3). The organic layers were combined and washed with H<sub>2</sub>O (15 cm<sup>3</sup>). All organic material was concentrated *in vacuo*, and purified by silica gel flash column chromatography (solvent A), giving the DOPE-analogue, **4**, as an almost colourless, waxy solid (207 mg, 93%): R<sub>f</sub> 0.56 [solvent B];  $\nu_{\max}$  (nujol mull)/cm<sup>-1</sup> 2291, 1728, 1461, 1238, 1075;  $\delta_{\text{H}}$  (270 MHz; CDCl<sub>3</sub>) 0.90 (6 H, t, *J* 7.4, 2 x CH<sub>2</sub>CH<sub>3</sub>), 1.17 – 1.34 (34 H, 2 m, 17 x CH<sub>2</sub>), 1.36 – 1.48 (6 H, m, 3 CH<sub>2</sub>), 1.48 – 1.56 (4 H, m, 2 x CH<sub>2</sub>CH<sub>2</sub>CO<sub>2</sub>), 2.02 – 2.10 (8 H, m, 2 x CH<sub>2</sub>C≡CCH<sub>2</sub>), 2.18 – 2.28 (4 H, m, 2 x CH<sub>2</sub>CO<sub>2</sub>), 3.03 – 3.15 (2 H, m, CH<sub>2</sub>NH<sub>3</sub>), 3.82 – 3.93 (2 H, m, glycerol-C3-H<sub>a,b</sub>), 3.97 – 4.05 (2 H, m, CH<sub>2</sub>CH<sub>2</sub>NH<sub>3</sub>), 4.08 (1 H, dd, <sup>2</sup>*J* 12.0, <sup>3</sup>*J* 6.8, glycerol-C1-H<sub>b</sub>), 4.31 (1 H, dd, <sup>2</sup>*J* 11.8, <sup>3</sup>*J* 2.6, glycerol-C1-H<sub>a</sub>), 5.14 (1 H, m, glycerol-C2-H), 8.20 – 8.60 (br s, NH<sub>3</sub>);  $\delta_{\text{C}}$  (100 MHz; CDCl<sub>3</sub>) 13.85 (2 x CH<sub>2</sub>CH<sub>3</sub>), 19.14, 22.93, 25.26, 25.33, 29.29, 29.59, 29.77, 29.82, 29.92, 30.00, 30.08, 30.10 (26 x CH<sub>2</sub>), 34.45, 34.64 (2 x CH<sub>2</sub>CO<sub>2</sub>), 40.77 (CH<sub>2</sub>NH<sub>3</sub>), 62.63 (m, POCH<sub>2</sub>CH<sub>2</sub>NH<sub>3</sub>) 62.95 (m, POCH<sub>2</sub>CHCH<sub>2</sub>), 64.29 (m, POCH<sub>2</sub>CHCH<sub>2</sub>), 70.63 (d, *J*<sub>CP</sub> 8.0, POCH<sub>2</sub>CHCH<sub>2</sub>), 80.37, 80.73, (2 x C≡C), 173.48, 173.76 (2 x CO<sub>2</sub>); *m/z* (FAB<sup>+</sup>) 740 ([M + H]<sup>+</sup>, 19), 600 (14), 599 (30), 81 (40), 69 (63), 55 (90), 44 (100); found [M + H]<sup>+</sup>, 740.522568, C<sub>41</sub>H<sub>75</sub>NO<sub>8</sub>P requires [M + H]<sup>+</sup>, 740.523033; HPLC *t*<sub>R</sub> = 4.3 min.
